# Supplementary material for: Proteomics-Based Approach for Detailing the Allergenic Profile of Cannabis Chemotypes
Source: MDPI journal article supplement (doi:10.3390/ijms241813964), 2023-09-11
Supplement: s1 [file s1]

**Table S1.** Unique peptides of putative allergens present in Cannabis plant varieties. *N.D.* - not detected.

| Protein ID #             | FASTA Protein name      | LFQ Intensity (MX strain) | LFQ Intensity (V1-19 strain) | LFQ Intensity (B5 strain) | LFQ Intensity (Hemp) | Homologous allergen (Source) | Route of exposure |
|--------------------------|-------------------------|---------------------------|------------------------------|---------------------------|----------------------|------------------------------|-------------------|
| A0A7J6G6Y5<br>A0A7J6HK93 | Purple acid phosphatase | 0.26E+10                  | <b>1.43E+10</b>              | 0.38E+10                  | 2.7E+09              | <i>Api m 3</i> (Honeybee)    | Systemic          |
| A0A7J6G4E2               |                         | 2.99E+09                  | <b>7.75E+09</b>              | 6.37E+09                  | 4.15E+09             |                              |                   |
| A0A7J6G5V2<br>A0A7J6DP71 |                         | 2.52E+08                  | 4.97E+08                     | <b>6.74E+08</b>           | 2.5E+08              |                              |                   |
| A0A7J6HKU1               |                         | 0.71E+08                  | 1.26E+08                     | 1.63E+08                  | <b>5.6E+08</b>       |                              |                   |
| A0A7J6HM49               |                         | 2.90E+07                  | <b>8.73E+07</b>              | 3.08E+07                  | 3.3E+07              |                              |                   |
| A0A7J6HM22               |                         | <b>7.60E+07</b>           | 3.91E+07                     | 5.88E+07                  | 3E+07                |                              |                   |
| A0A7J6HKG5<br>A0A7J6G4D3 |                         | 0.97E+07                  | <b>2.18E+07</b>              | 1.52E+07                  | <i>N.D.</i>          |                              |                   |
| A0A7J6FG55<br>A0A7J6FXQ0 |                         | <i>N.D.</i>               | 2.06E+07                     | <b>2.47E+07</b>           | <i>N.D.</i>          |                              |                   |
| A0A7J6F0B8               |                         | 1.58E+07                  | 1.37E+07                     | 3.52E+07                  | <b>5.4E+07</b>       |                              |                   |
| A0A7J6GRN0               |                         | <i>N.D.</i>               | <b>1.35E+07</b>              | <i>N.D.</i>               | <i>N.D.</i>          |                              |                   |
| A0A7J6F9L6<br>A0A7J6FM87 |                         | <i>N.D.</i>               | <i>N.D.</i>                  | <b>1.59E+07</b>           | <i>N.D.</i>          |                              |                   |

|                                                      |                     |          |          |          |         |                                                 |                     |
|------------------------------------------------------|---------------------|----------|----------|----------|---------|-------------------------------------------------|---------------------|
| A0A7J6G664                                           |                     | N.D.     | N.D.     | 6.67E+07 | N.D.    |                                                 |                     |
| A0A7J6EZ30                                           | Germin-like protein | 0.49E+10 | 1.18E+10 | 0.25E+10 | 1.3E+10 | Cit s 1 (Sweet orange)                          | Food                |
| A0A7J6HWG7                                           |                     | 0.79E+09 | 5.25E+09 | 0.93E+09 | 9.5E+08 |                                                 |                     |
| A0A7J6EL31<br>A0A7J6EXR1                             |                     | 0.52E+09 | 1.13E+09 | 1.05E+09 | 4.5E+08 |                                                 |                     |
| A0A7J6HB19                                           |                     | 0.62E+08 | 1.12E+08 | 0.36E+08 | N.D.    |                                                 |                     |
| A0A7J6HCP0                                           |                     | 0.87E+08 | 0.59E+08 | 2.48E+08 | N.D.    |                                                 |                     |
| A0A7J6I2N2                                           |                     | 3.09E+07 | 5.87E+07 | N.D.     | N.D.    |                                                 |                     |
| A0A7J6DNM0<br>A0A7J6DQN0                             |                     | 2.54E+07 | N.D.     | 9.82E+07 | N.D.    |                                                 |                     |
| A0A7J6I4D6<br>A0A7J6FUP8<br>A0A7J6EHQ3<br>A0A7J6EKL2 | Patatin             | 1.29E+10 | 1.08E+10 | 0.24E+10 | 1.1E+09 | Hev b 7 (Latex rubber)<br><br>Sola t 1 (Potato) | Contact<br><br>Food |
| A0A7J6GFY3<br>A0A7J6GG48                             |                     | 0.06E+09 | 3.92E+09 | 1.30E+09 | 3.2E+07 |                                                 |                     |
| A0A7J6GCU9<br>A0A7J6GD72                             |                     | 1.16E+09 | 3.62E+09 | 0.65E+09 | 1.4E+08 |                                                 |                     |
| A0A7J6FBN8<br>A0A7J6GLU6<br>A0A7J6H6S6<br>A0A7J6E5A3 |                     | 1.54E+08 | N.D.     | 1.02E+07 | N.D.    |                                                 |                     |

|                                                                                  |                                                      |          |          |          |          |                   |      |
|----------------------------------------------------------------------------------|------------------------------------------------------|----------|----------|----------|----------|-------------------|------|
| A0A7J6I2Z0                                                                       |                                                      | N.D.     | 2.87E+06 | N.D.     | 6.65E+06 |                   |      |
| A0A7J6GUI2<br>A0A7J6ENV8                                                         | Chlorophyll a-b binding,<br>chloroplast              | 1.15E+10 | 1.08E+10 | 0.54E+10 | 3.3E+10  | Api g 3 (Celery)  | Food |
| A0A7J6E9Z3                                                                       |                                                      | 0.26E+10 | 1.34E+10 | 0.46E+10 | 5.3E+09  |                   |      |
| A0A7J6FCQ7                                                                       |                                                      | 1.49E+09 | 1.56E+09 | 1.89E+09 | 4.8E+09  |                   |      |
| A0A7J6GN45<br>A0A7J6I6P7<br>A0A7J6I1W9                                           |                                                      | 4.28E+08 | 7.43E+08 | 7.92E+08 | 1.9E+09  |                   |      |
| A0A7J6GN20                                                                       |                                                      | 5.24E+08 | 7.33E+08 | 5.98E+08 | 1.1E+09  |                   |      |
| A0A7J6I6H8                                                                       |                                                      | 2.99E+08 | 5.64E+08 | 5.23E+08 | 1.2E+09  |                   |      |
| A0A7J6I1T4                                                                       |                                                      | 6.46E+08 | 4.83E+08 | 5.84E+08 | 8E+09    |                   |      |
| A0A7J6ICI2                                                                       |                                                      | 1.82E+08 | 2.92E+08 | 2.46E+08 | 3.2E+08  |                   |      |
| A0A7J6GSM8                                                                       |                                                      | 0.88E+08 | 1.44E+08 | 0.97E+08 | 5.1E+08  |                   |      |
| A0A7J6GTJ9                                                                       |                                                      | N.D.     | 1.55E+07 | 3.40E+07 | 1.6E+09  |                   |      |
| A0A7J6GAG5                                                                       |                                                      | N.D.     | N.D.     | N.D.     | 1.4E+09  |                   |      |
| A0A7J6HU96                                                                       |                                                      | N.D.     | N.D.     | N.D.     | 2.23E+06 |                   |      |
| A0A7J6EG53<br>A0A7J6H8I4<br>A0A7J6FMU3<br>A0A7J6HHS7<br>A0A7J6G0I6<br>A0A7J6FM26 | Cyclophilin (Peptidyl-prolyl<br>cis-trans isomerase) | 9.94E+09 | 9.85E+09 | 5.98E+09 | 7.33E+09 | Ara h 18 (Peanut) | Food |

|                                        |                      |                 |                 |                 |                 |                               |         |
|----------------------------------------|----------------------|-----------------|-----------------|-----------------|-----------------|-------------------------------|---------|
| A0A7J6FM12<br>A0A7J6DLL0               |                      | 1.62E+09        | <b>2.17E+09</b> | 0.84E+09        | 1.98E+09        | Asp f 27 (Fungi-Ascomycete)   | Airway  |
|                                        |                      |                 |                 |                 |                 | Bet v 7 (White birch)         | Airway  |
| A0A7J6GX90<br>A0A7J6HKI4<br>A0A7J6E511 |                      | 2.98E+08        | 6.83E+08        | 5.59E+08        | <b>1.06E+09</b> | Cat r 1 (Rosy periwinkle)     | Airway  |
| A0A7J6ICC5                             |                      | 5.99E+08        | 6.66E+08        | 7.18E+08        | <b>7.85E+08</b> | Der f 29 (House dust mite)    | Airway  |
| A0A7J6EHL2                             |                      | 3.84E+08        | <b>4.02E+08</b> | 3.00E+08        | 3.08E+08        | Der p 29 (House dust mite)    | Airway  |
| A0A7J6FIH3                             |                      | 7.46E+07        | 8.12E+07        | 8.48E+07        | <b>9E+07</b>    |                               |         |
| A0A7J6FMC9                             |                      | N.D.            | 4.61E+07        | <b>5.16E+07</b> | N.D.            | Mala s 6 (Skin yeast)         | Contact |
| A0A7J6H982                             |                      | N.D.            | 3.82E+07        | N.D.            | 6.60E+06        | Ole e 15 (Olive)              | Airway  |
| A0A7J6HET7                             |                      | 1.35E+07        | <b>3.14E+07</b> | 2.75E+07        | N.D.            | Psi c 2 (Fungi-Basidiomycete) | Airway  |
| A0A7J6F3F0<br>A0A7J6ECK7               |                      | <b>4.83E+07</b> | 1.77E+07        | 2.51E+07        | 2.1E+07         |                               |         |
| A0A7J6I7K3                             |                      | 7.04E+06        | N.D.            | N.D.            | <b>7.08E+07</b> | Sola l 5 (Tomato)             | Food    |
| A0A7J6GVF7                             |                      | N.D.            | N.D.            | N.D.            | <b>3.4E+07</b>  |                               |         |
| A0A7J6I9I7                             |                      | N.D.            | N.D.            | N.D.            | <b>2E+07</b>    |                               |         |
| A0A7J6EZ77                             | Malate dehydrogenase | 4.85E+09        | 7.74E+09        | 7.42E+09        | <b>9.92E+09</b> |                               |         |
| A0A7J6E8J3<br>A0A7J6F4C2               |                      | 4.27E+09        | 3.76E+09        | 3.71E+09        | <b>8.79E+09</b> | Mala f 4 (Skin yeast)         | Contact |
| A0A7J6E1Y2                             |                      | 2.06E+08        | 5.72E+08        | <b>6.36E+08</b> | 5.03E+08        |                               |         |

|                                        |                                          |                 |                 |                 |                 |                                                                                             |                          |
|----------------------------------------|------------------------------------------|-----------------|-----------------|-----------------|-----------------|---------------------------------------------------------------------------------------------|--------------------------|
| A0A7J6GGJ8                             |                                          | 0.42E+07        | 5.39E+08        | <b>5.93E+08</b> | 4.07E+08        |                                                                                             |                          |
| A0A7J6EH81                             |                                          | 3.41E+08        | 4.43E+08        | 2.72E+08        | <b>1.90E+09</b> |                                                                                             |                          |
| A0A7J6FBS2                             |                                          | <i>N.D.</i>     | <i>N.D.</i>     | <i>N.D.</i>     | <b>3.95E+08</b> |                                                                                             |                          |
| A0A7J6F3P9                             | Catalase                                 | 1.39E+10        | 0.57E+10        | <b>1.88E+10</b> | 8.59E+09        | <i>Pen c 30</i> (Fungi-Ascomycete)                                                          | Airway                   |
| A0A7J6HVQ1                             |                                          | <b>2.28E+09</b> | 0.61E+09        | 1.00E+09        | 1.89E+09        |                                                                                             |                          |
| A0A7J6E3I7                             | Plastocyanin                             | 1.24E+09        | <b>4.62E+09</b> | 4.20E+09        | 3.05E+09        | <i>Amb a 7</i> (Short ragweed)                                                              | Airway                   |
| A0A7J6HQB8<br>A0A7J6FZ57               | Glyceraldehyde-3-phosphate dehydrogenase | 4.28E+09        | 4.23E+09        | 2.54E+09        | <b>1.08E+10</b> | <i>Pan h 13</i> (Striped catfish)<br><i>Per a 13</i> (Cockroach)<br><i>Tri a 34</i> (Wheat) | Food<br>Airway<br>Airway |
| A0A7J6FL67                             |                                          | 0.87E+09        | 1.26E+09        | 0.67E+09        | <b>2.44E+09</b> |                                                                                             |                          |
| A0A7J6GU43<br>A0A7J6EJG0<br>A0A7J6FHP7 | Protein disulfide-isomerase              | 3.20E+09        | 4.20E+09        | 6.46E+09        | <b>7.68E+09</b> | <i>Alt a 4</i> (Fungi-Ascomycete)                                                           | Airway                   |
| A0A7J6E6I1                             |                                          | 1.13E+09        | 0.75E+09        | 0.59E+09        | <b>2.06E+09</b> |                                                                                             |                          |
| A0A7J6FGV5                             |                                          | 4.20E+08        | 6.32E+08        | 8.31E+08        | <b>1.36E+09</b> |                                                                                             |                          |
| A0A7J6HAJ3                             |                                          | <i>N.D.</i>     | 0.66E+07        | 1.52E+07        | <b>1.36E+09</b> |                                                                                             |                          |
| A0A7J6HM83<br>A0A7J6FQT2               |                                          | <i>N.D.</i>     | <i>N.D.</i>     | <i>N.D.</i>     | <b>8.32E+08</b> |                                                                                             |                          |

|                          |                                       |                 |                 |                 |                 |                               |         |
|--------------------------|---------------------------------------|-----------------|-----------------|-----------------|-----------------|-------------------------------|---------|
| A0A7J6F8T7               | Thioredoxin domain-containing protein | 1.68E+09        | <b>3.67E+09</b> | 1.30E+09        | 1.88E+09        | Asp f 28 (Fungi-Ascomycete)   | Airway  |
| A0A7J6G4W4<br>A0A7J6EM56 |                                       | 5.59E+08        | 4.91E+08        | 3.32E+08        | <b>1.14E+09</b> |                               |         |
| A0A7J6HKK7<br>A0A7J6GEH8 |                                       | 0.82E+08        | 3.46E+08        | 1.37E+08        | <b>4.01E+08</b> |                               |         |
| A0A7J6DWJ5               |                                       | 1.02E+08        | 2.40E+08        | 1.64E+08        | <b>2.81E+08</b> |                               |         |
| A0A7J6EP85<br>A0A7J6EBB3 |                                       | 1.41E+08        | <b>2.22E+08</b> | 1.31E+08        | 1.34E+08        |                               |         |
| A0A7J6GEK2               |                                       | 1.34E+08        | <b>2.11E+08</b> | 2.06E+08        | 1.41E+08        |                               |         |
| A0A7J6FRK6<br>A0A7J6GSW1 |                                       | 3.30E+07        | 2.85E+07        | <b>6.54E+07</b> | 1.55E+07        |                               |         |
| A0A7J6HB22<br>A0A7J6DM82 |                                       | <i>N.D.</i>     | 2.27E+07        | 1.39E+07        | <b>2.54E+07</b> |                               |         |
| A0A7J6I4E0               |                                       | 1.08E+07        | <b>1.80E+07</b> | 1.29E+07        |                 |                               |         |
| A0A7J6H1C4               |                                       | 1.02E+07        | 1.68E+07        | 0.70E+07        | <b>2.08E+07</b> |                               |         |
| A0A7J6FPC0               |                                       | 0.31E+07        | <b>1.37E+07</b> | 1.03E+07        |                 |                               |         |
| A0A7J6I370               |                                       | 1.15E+07        | 1.01E+07        | <i>N.D.</i>     | <b>1.30E+08</b> |                               |         |
| A0A7J6DN91               |                                       | <i>N.D.</i>     | <b>7.2E+06</b>  | <i>N.D.</i>     |                 |                               |         |
| A0A7J6FL75               |                                       | 1.62E+07        | 0.38E+07        | 1.08E+07        | <b>9.25E+07</b> |                               |         |
| A0A7J6GJ28               |                                       | <b>3.71E+07</b> | <i>N.D.</i>     | <i>N.D.</i>     |                 |                               |         |
| A0A7J6GHT3               |                                       | <i>N.D.</i>     | <i>N.D.</i>     | <i>N.D.</i>     | <b>8.10E+07</b> |                               |         |
| A0A7J6HAM6               |                                       | <i>N.D.</i>     | <i>N.D.</i>     | <i>N.D.</i>     | <b>3.22E+07</b> |                               |         |
| A0A7J6DS35               |                                       | <i>N.D.</i>     | <i>N.D.</i>     | <i>N.D.</i>     | <b>2.18E+07</b> |                               |         |
| A0A7J6E9X5<br>A0A7J6FRN3 |                                       | <i>N.D.</i>     | <i>N.D.</i>     | <i>N.D.</i>     | <b>1.43E+07</b> |                               |         |
| A0A7J6F172               |                                       | <i>N.D.</i>     | <i>N.D.</i>     | <i>N.D.</i>     | <b>1.24E+07</b> |                               |         |
| A0A7J6HIT6               |                                       | <i>N.D.</i>     | <i>N.D.</i>     | <i>N.D.</i>     | <b>2.96E+06</b> |                               |         |
|                          |                                       |                 |                 |                 |                 | Asp f 29 (Fungi-Ascomycete)   | Airway  |
|                          |                                       |                 |                 |                 |                 | Cop c 2 (Fungi-Basidiomycete) | Airway  |
|                          |                                       |                 |                 |                 |                 | Fus c 2 (Fungi-Ascomycete)    | Airway  |
|                          |                                       |                 |                 |                 |                 | Mala s 13 (Skin yeast)        | Contact |
|                          |                                       |                 |                 |                 |                 | Plo i 2 (Moth)                | Airway  |
|                          |                                       |                 |                 |                 |                 | Tri a 15 (Wheat)              | Food    |
|                          |                                       |                 |                 |                 |                 | Zea m 25 (Maize)              | Airway  |

|                                                |                                |          |          |          |                           |                             |        |        |
|------------------------------------------------|--------------------------------|----------|----------|----------|---------------------------|-----------------------------|--------|--------|
| A0A7J6GR52                                     | Glutathione transferase        | 2.47E+09 | 3.29E+09 | 3.27E+09 | 2.84E+09                  | Alt a 13 (Fungi-Ascomycete) | Airway |        |
| A0A7J6F7P6                                     |                                | 1.79E+08 | 3.18E+08 | N.D.     | 1.95E+08                  | Asc l 13 (Roundworm)        |        | Food   |
| A0A7J6F7M2                                     |                                | 1.70E+08 | 2.47E+08 | 0.64E+08 | 2.96E+07                  | Asc l 13 (Pig roundworm)    |        | Food   |
| A0A7J6I7R8                                     |                                | 0.96E+08 | 1.08E+08 | 1.25E+08 | 1.19E+07                  | Bet v 8 (White birch)       |        | Airway |
| A0A7J6F7K5<br>A0A7J6GPS7                       |                                | 6.62E+07 | 6.31E+07 | 6.36E+07 | 2.84E+09                  | Bla g 5 (Cockroach)         |        | Airway |
|                                                |                                |          |          |          |                           | Blo t 8 (Storage mite)      |        | Airway |
| A0A7J6I7S2                                     |                                | 4.81E+07 | 2.77E+07 | 5.42E+07 | 7.41E+06                  | Der f 8 (House dust mite)   |        | Airway |
|                                                | Der p 8 (House dust mite)      |          |          |          |                           | Airway                      |        |        |
| A0A7J6E5J2<br><br>A0A7J6EBM3<br><br>A0A7J6GPM5 | Fructose-bisphosphate aldolase | 4.12E+09 | 3.02E+09 | 2.56E+09 | 1.31E+10                  | Per a 5 (Cockroach)         | Airway |        |
|                                                |                                |          |          |          |                           | Tyr p 8 (Storage mite)      |        |        |
|                                                |                                |          |          |          |                           | Gad m 3 (Atlantic cod)      |        | Food   |
|                                                |                                |          |          |          |                           | Pan h 3 (Striped catfish)   |        | Food   |
| A0A7J6GPM5                                     | 4.38E+08                       | 3.72E+08 | 3.27E+08 | 1.73E+09 | Sal s 3 (Atlantic salmon) | Food                        |        |        |
|                                                |                                |          |          |          | Thu a 3 (Yellowfin tuna)  | Food                        |        |        |

|                                        |                                            |             |                 |             |                 |                                                                                                                    |                                           |
|----------------------------------------|--------------------------------------------|-------------|-----------------|-------------|-----------------|--------------------------------------------------------------------------------------------------------------------|-------------------------------------------|
| <b>A0A7J6FZU7</b><br><b>A0A7J6GZL8</b> |                                            | <i>N.D.</i> | <i>N.D.</i>     | <i>N.D.</i> | <b>7.42E+09</b> |                                                                                                                    |                                           |
| <b>A0A7J6FS68</b><br><b>A0A7J6E4J8</b> | <b>Superoxide dismutase</b>                | 0.44E+08    | <b>2.07E+09</b> | 0.56E+08    | 6.36E+08        | <i>Alt a 14</i> (Fungi-Ascomycete)                                                                                 | Airway                                    |
| <b>A0A7J6FXY1</b><br><b>A0A7J6GEA8</b> |                                            | 0.85E+09    | <b>1.71E+09</b> | 0.80E+08    | 4.45E+08        | <i>Amb t 13</i> (Giant ragweed)                                                                                    | Airway                                    |
| <b>A0A7J6EWT4</b>                      |                                            | 0.04E+08    | <b>2.37E+08</b> | 0.20E+08    | 4.15E+07        | <i>Art si 8</i> (Wormwood)                                                                                         | Airway                                    |
| <b>A0A7J6G1D4</b>                      |                                            | <i>N.D.</i> | <i>N.D.</i>     | <i>N.D.</i> | <b>1.79E+09</b> | <i>Asp f 6</i> (Fungi-Ascomycete)                                                                                  | Airway                                    |
| <b>A0A7J6G1D4</b>                      |                                            | <i>N.D.</i> | <i>N.D.</i>     | <i>N.D.</i> | <b>1.79E+09</b> | <i>Hev b 10</i> (Latex rubber)                                                                                     | Contact                                   |
| <b>A0A7J6ELP6</b><br><b>A0A7J6HB40</b> |                                            | <i>N.D.</i> | <i>N.D.</i>     | <i>N.D.</i> | <b>1.08E+09</b> | <i>Mala s 11</i> (Skin yeast)                                                                                      | Contact                                   |
| <b>A0A7J6FFH3</b>                      |                                            | <i>N.D.</i> | <i>N.D.</i>     | <i>N.D.</i> | <b>1.64E+07</b> | <i>Pis v 4</i> (Pistachio)                                                                                         | Food                                      |
| <b>A0A7J6HF70</b>                      | <b>Non-specific lipid-transfer protein</b> | 3.31E+09    | 2.02E+09        | 1.06E+09    | <b>3.80E+10</b> | <i>Amb a 6</i> (Short ragweed)<br><i>Ara h 9</i> (Peanut)<br><i>Ara h 17</i> (Peanut)<br><i>Cor a 8</i> (Hazelnut) | Airway<br>Food<br>Food<br>Food<br>Contact |



|                                                                                  |                                         |             |                 |             |                 |                                                                                                                                                                      |                                      |
|----------------------------------------------------------------------------------|-----------------------------------------|-------------|-----------------|-------------|-----------------|----------------------------------------------------------------------------------------------------------------------------------------------------------------------|--------------------------------------|
| <b>A0A7J6HF68</b>                                                                |                                         | <i>N.D.</i> | 3.66E+08        | <i>N.D.</i> | <b>3.70E+09</b> | <i>Hev b 12</i> (Latex rubber)<br><i>Mal d 3</i> (Apple)<br><i>Mus a 3</i> (Banana)<br><i>Pru p 3</i> (Peach)<br><i>Sola l 3</i> (Tomato)<br><i>Tri a 14</i> (Wheat) | Food<br>Food<br>Food<br>Food<br>Food |
| <b>A0A7J6H3P5</b>                                                                | <b>Aldehyde dehydrogenase</b>           | 2.99E+09    | 1.39E+09        | 2.56E+09    | <b>5.40E+09</b> | <i>Alt a 10</i> (Fungi-Ascomycete)                                                                                                                                   | Airway                               |
| <b>A0A7J6GTH1</b><br><b>A0A7J6I6F2</b><br><b>A0A7J6FAG8</b><br><b>A0A7J6DL32</b> |                                         | 1.29E+07    | <i>N.D.</i>     | <i>N.D.</i> | <b>1.09E+08</b> | <i>Cla h 10</i> (Fungi-Ascomycete)<br><i>Har a 2</i> (Ladybeetle)                                                                                                    | Airway<br>Airway                     |
| <b>A0A7J6FQ30</b><br><b>A0A7J6DLS9</b><br><b>A0A7J6HHA5</b>                      |                                         | <i>N.D.</i> | <i>N.D.</i>     | <i>N.D.</i> | <b>5.38E+07</b> | <i>Tyr p 35</i> (Storage mite)                                                                                                                                       | Airway                               |
| <b>A0A7J6GYE1</b>                                                                | <b>Ferritin</b>                         | 2.03E+09    | 1.38E+09        | 1.55E+09    | <b>2.94E+09</b> | <i>Der f 30</i> (House dust mite)<br><i>Der p 30</i> (House dust mite)                                                                                               | Airway<br>Airway                     |
| <b>A0A7J6H5H4</b>                                                                | <b>SERPIN domain-containing protein</b> | 0.69E+09    | <b>1.31E+09</b> | 0.93E+09    | 1.04E+09        | <i>Der f 27</i> (House dust mite)<br><i>Tri a 33</i> (Wheat)                                                                                                         | Airway<br>Airway                     |

|                                        |                                     |          |          |          |          |                                                |                     |
|----------------------------------------|-------------------------------------|----------|----------|----------|----------|------------------------------------------------|---------------------|
| A0A7J6EKG1<br>A0A7J6ENE6<br>A0A7J6EKM6 | (1->3)-beta-glucan<br>endohydrolase | 0.38E+10 | 0.13E+10 | 1.12E+10 | 1.15E+09 | Hev b 2 (Latex rubber)<br><br>Mus a 5 (Banana) | Contact<br><br>Food |
| A0A7J6EAU5                             |                                     | 1.79E+09 | 0.94E+09 | 1.82E+09 | 2.51E+09 |                                                |                     |
| A0A7J6E4K5                             |                                     | 1.89E+08 | 6.98E+08 | 5.97E+08 | 2.00E+08 |                                                |                     |
| A0A7J6EUT7                             |                                     | 2.16E+08 | 5.50E+08 | 4.00E+08 | 1.44E+08 |                                                |                     |
| A0A7J6EAV2<br>A0A7J6EF61<br>A0A7J6E8S1 |                                     | 0.57E+09 | 0.53E+09 | 3.08E+09 | 4.66E+08 |                                                |                     |
| A0A7J6E8M2<br>A0A7J6ED18               |                                     | N.D.     | 4.94E+08 | 0.04E+08 | 9.19E+06 |                                                |                     |
| A0A7J6DMI6                             |                                     | 2.66E+08 | 4.45E+08 | 4.85E+08 | 2.69E+08 |                                                |                     |
| A0A7J6IAD9                             |                                     | 2.47E+08 | 3.76E+08 | 3.16E+08 | 3.02E+08 |                                                |                     |
| A0A7J6EGQ4<br>A0A7J6EY25               |                                     | 0.57E+08 | 1.67E+08 | 0.83E+08 | N.D.     |                                                |                     |
| A0A7J6GT01                             |                                     | 0.43E+08 | 1.47E+08 | 1.60E+08 | 1.40E+08 |                                                |                     |
| A0A7J6DP61                             |                                     | 0.72E+08 | 1.15E+08 | 0.96E+08 | 4.50E+07 |                                                |                     |
| A0A7J6HGX0                             |                                     | N.D.     | 1.14E+08 | 0.65E+08 | 1.57E+08 |                                                |                     |
| A0A7J6HJN1                             |                                     | 3.02E+07 | 7.18E+07 | 9.76E+07 | 1.05E+08 |                                                |                     |
| A0A7J6H4Q0                             |                                     | 2.80E+07 | 7.07E+07 | 4.06E+07 | 1.56E+07 |                                                |                     |
| A0A7J6FD71                             |                                     | 7.54E+07 | 6.71E+07 | 9.47E+07 | N.D.     |                                                |                     |

|                                        |                              |          |          |          |          |                              |        |
|----------------------------------------|------------------------------|----------|----------|----------|----------|------------------------------|--------|
| A0A7J6DX44                             |                              | 4.70E+07 | 6.42E+07 | 5.60E+07 | 1.44E+08 |                              |        |
| A0A7J6HXP0                             |                              | 4.35E+07 | 5.03E+07 | 4.47E+07 | 4.34E+08 |                              |        |
| A0A7J6HX51<br>A0A7J6GXU4               |                              | 8.61E+07 | 5.02E+07 | 9.81E+07 | 7.07E+07 |                              |        |
| A0A7J6GB53<br>A0A7J6FB88               |                              | 1.97E+07 | 3.58E+07 | 2.61E+07 | 2.53E+08 |                              |        |
| A0A7J6FI62<br>A0A7J6F9Z7               |                              | 2.29E+07 | 2.31E+07 | 3.53E+07 | 1.09E+08 |                              |        |
| A0A7J6GWF6                             |                              | N.D.     | 1.96E+07 | N.D.     | N.D.     |                              |        |
| A0A7J6H3Z8                             |                              | 0.50E+07 | 1.01E+07 | 4.96E+07 | N.D.     |                              |        |
| A0A7J6FJI4<br>A0A7J6DR16<br>A0A7J6DR07 |                              | 8.05E+06 | N.D.     | 9.56E+06 | 4.71E+07 |                              |        |
| A0A7J6FD71<br>A0A7J6HX99<br>A0A7J6G837 |                              | N.D.     | N.D.     | N.D.     | 6.61E+07 |                              |        |
| A0A7J6FXV3<br>A0A7J6EFE3               |                              | N.D.     | N.D.     | N.D.     | 1.30E+07 |                              |        |
| A0A7J6HXL1                             |                              | N.D.     | N.D.     | N.D.     | 1.25E+07 |                              |        |
| A0A7J6HB83                             | Calreticulin                 | 0.71E+09 | 1.06E+09 | 1.55E+09 | 5.09E+09 | Pen ch 31 (Fungi-Ascomycete) | Airway |
| A0A7J6HB40<br>A0A7J6ELP6               | Superoxide dismutase [Cu-Zn] | 2.03E+09 | 0.99E+09 | 2.59E+09 | 1.08E+09 | Ole e 5 (Olive)              | Airway |
| A0A7J6G1D4                             |                              | N.D.     | N.D.     | N.D.     | 1.79E+09 |                              |        |

|                                        |                           |          |          |          |          |                                                            |        |
|----------------------------------------|---------------------------|----------|----------|----------|----------|------------------------------------------------------------|--------|
| A0A7J6FFH3                             |                           | N.D.     | N.D.     | N.D.     | 1.64E+07 |                                                            |        |
| A0A7J6H7M3                             | Transaldolase             | 9.54E+08 | 8.70E+08 | 8.82E+08 | 1.93E+09 | Cla c 14 (Fungi-Ascomycete)                                | Airway |
| A0A7J6IAQ6                             |                           | 2.42E+08 | 4.43E+08 | 2.20E+08 | 3.43E+08 | Fus p 4 (Fungi-Ascomycete)<br>Pen ch 35 (Fungi-Ascomycete) |        |
| A0A7J6GLE4<br>A0A7J6FKP2<br>A0A7J6FA10 | Peptidyl-prolyl isomerase | 2.30E+08 | 8.23E+08 | 5.99E+08 | 2.42E+08 | Asp f 11 (Fungi-Ascomycete)                                | Airway |
| A0A7J6FHX4<br>A0A7J6GJU3<br>A0A7J6E5K1 |                           | 2.02E+08 | 1.84E+08 | 2.70E+08 | 7.40E+08 |                                                            |        |
| A0A7J6GB79                             |                           | 1.72E+08 | 1.50E+08 | 0.93E+07 | N.D.     |                                                            |        |
| A0A7J6FRD7                             |                           | 0.90E+08 | 1.08E+08 | 1.35E+08 | 1.22E+07 |                                                            |        |
| A0A7J6G5Y5                             |                           | 1.12E+08 | 1.06E+08 | 1.32E+08 | 2.76E+08 |                                                            |        |
| A0A7J6E8B7                             |                           | 6.10E+07 | 9.19E+07 | 4.23E+07 | 2.09E+07 |                                                            |        |
| A0A7J6FHQ5<br>A0A7J6DRN2               |                           | 6.05E+07 | 3.72E+07 | 5.18E+07 | 2.02E+08 |                                                            |        |

|                          |                                                     |          |          |          |          |                                                                    |                      |
|--------------------------|-----------------------------------------------------|----------|----------|----------|----------|--------------------------------------------------------------------|----------------------|
| A0A7J6HL15<br>A0A7J6GBJ4 |                                                     | 5.58E+07 | 3.63E+07 | 3.47E+07 | 3.08E+07 |                                                                    |                      |
| A0A7J6FIT5               |                                                     | N.D.     | 3.57E+07 | N.D.     | N.D.     |                                                                    |                      |
| A0A7J6E7Z6<br>A0A7J6E0U6 |                                                     | 4.43E+07 | 2.73E+07 | 2.59E+07 | 9.76E+07 |                                                                    |                      |
| A0A7J6I417               |                                                     | 5.20E+06 | 5.51E+06 | N.D.     | 1.27E+07 |                                                                    |                      |
| A0A7J6FIE1               |                                                     | 7.30E+06 | N.D.     | 7.63E+06 | N.D.     |                                                                    |                      |
| A0A7J6H5W6               |                                                     | N.D.     | N.D.     | N.D.     | 9.82E+08 |                                                                    |                      |
| A0A7J6GIP5               | Chitin-binding type-1 domain-<br>containing protein | 4.85E+09 | 3.62E+09 | 1.05E+10 | 2.81E+09 | Der f 18 (House dust<br>mite)<br><br>Der p 18 (House dust<br>mite) | Airway<br><br>Airway |
| A0A7J6I6L6               |                                                     | 0.59E+09 | 0.70E+09 | 1.01E+09 | 5.65E+08 |                                                                    |                      |
| A0A7J6HSM0               |                                                     | 2.66E+08 | 2.03E+08 | 3.87E+08 | 1.06E+09 |                                                                    |                      |
| A0A7J6G347               |                                                     | 2.56E+08 | 0.51E+08 | 4.75E+08 | 4.52E+08 |                                                                    |                      |
| A0A7J6I847               |                                                     | 5.47E+07 | 4.86E+07 | 6.48E+07 | N.D.     |                                                                    |                      |
| A0A7J6H5Q7<br>A0A7J6IBH0 |                                                     | N.D.     | 0.84E+07 | 9.16E+07 | 1.30E+09 |                                                                    |                      |

|                                        |                                        |          |          |          |          |                            |        |
|----------------------------------------|----------------------------------------|----------|----------|----------|----------|----------------------------|--------|
| A0A7J6IBR9<br>A0A7J6IC31<br>A0A7J6IAL0 |                                        | 8.02E+07 | 0.76E+07 | 4.79E+07 | 1.30E+09 |                            |        |
| A0A7J6EH05                             |                                        | N.D.     | N.D.     | 3.72E+07 | N.D.     |                            |        |
| A0A7J6FLX5                             |                                        | N.D.     | N.D.     | 3.51E+08 | N.D.     |                            |        |
| A0A7J6EFZ4                             |                                        | N.D.     | N.D.     | N.D.     | 1.50E+07 |                            |        |
| A0A7J6H1D6                             | L-ascorbate peroxidase                 | 0.73E+08 | 6.28E+08 | 3.17E+08 | 3.86E+07 | Mus a 6 (Banana)           | Food   |
| A0A7J6HD14                             |                                        | 4.53E+09 | 8.65E+09 | 8.72E+09 | 1.04E+10 |                            |        |
| A0A7J6GTH6                             |                                        | 7.58E+08 | 3.34E+08 | 7.34E+08 | 8.42E+08 |                            |        |
| A0A7J6G6C0<br>A0A7J6F1W2               |                                        | 4.98E+08 | 2.60E+08 | 2.70E+08 | 1.64E+09 |                            |        |
| A0A7J6FIL3                             |                                        | 0.81E+08 | 0.81E+08 | 1.90E+08 | N.D.     |                            |        |
| A0A7J6HAM9                             |                                        | N.D.     | N.D.     | N.D.     | 1.31E+08 |                            |        |
| A0A7J6HW67                             | Cystatin-domain containing protein     | 3.55E+08 | 5.29E+08 | 5.65E+08 | 2.66E+08 | Can f 8 (Dog)              | Airway |
| A0A7J6FUY4<br>A0A7J6EHC3               |                                        | N.D.     | N.D.     | N.D.     | 4.48E+07 | Fel d 3 (Cat)              | Airway |
| A0A7J6I1W7                             | Cytochrome c-domain containing protein | 4.22E+08 | 5.27E+08 | 4.95E+08 | 1.71E+09 | Cur l 3 (Fungi-Ascomycete) | Airway |

|                                        |                                            |          |          |          |          |                            |          |
|----------------------------------------|--------------------------------------------|----------|----------|----------|----------|----------------------------|----------|
| A0A7J6I2T9                             |                                            | 2.00E+08 | 3.29E+08 | 3.72E+08 | 6.63E+08 |                            |          |
| A0A7J6I6Q5                             | Pyruvate kinase                            | 6.48E+08 | 4.36E+08 | 8.12E+08 | 1.46E+09 | Pan h 9 (Striped catfish)  | Food     |
| A0A7J6ERQ0                             |                                            | 5.15E+08 | 3.52E+08 | 7.38E+08 | 8.51E+08 |                            |          |
| A0A7J6DYV9<br>A0A7J6H2G3<br>A0A7J6GGC3 |                                            | 2.29E+07 | 3.75E+07 | 1.81E+07 | 3.76E+07 |                            |          |
| A0A7J6I003                             |                                            | 3.65E+07 | 1.97E+07 | 1.30E+07 | 1.00E+09 |                            |          |
| A0A7J6FR44<br>A0A7J6G7G2               |                                            | 1.06E+08 | 1.27E+07 | 4.97E+07 | 2.04E+08 |                            |          |
| A0A7J6FBC2                             |                                            | 6.56E+07 | N.D.     | 2.03E+07 | N.D.     |                            |          |
| A0A7J6I9Q3                             |                                            | N.D.     | N.D.     | N.D.     | 1.59E+07 |                            |          |
| A0A7J6I9W7                             | Glucose-6-phosphate isomerase              | 2.86E+08 | 3.89E+08 | 5.50E+08 | 3.37E+08 | Pan h 11 (Striped catfish) | Food     |
| A0A7J6EVW4                             |                                            | 3.15E+08 | 1.64E+08 | 1.74E+08 | 4.77E+08 |                            |          |
| A0A7J6HKD1                             | Eukaryotic translation initiation factor 3 | 2.00E+08 | 3.83E+08 | 2.14E+08 | 1.77E+08 | For t 2 (Biting midge)     | Systemic |

|                                                      |  |                 |                 |          |                 |  |  |
|------------------------------------------------------|--|-----------------|-----------------|----------|-----------------|--|--|
| A0A7J6G256<br>A0A7J6HPQ8<br>A0A7J6ESZ1<br>A0A7J6I4V0 |  | 3.16E+08        | 2.81E+08        | 2.13E+08 | <b>6.36E+08</b> |  |  |
| A0A7J6GJB4                                           |  | 0.73E+08        | <b>1.44E+08</b> | 0.91E+08 | 8.98E+07        |  |  |
| A0A7J6EJL9<br>A0A7J6GJ62<br>A0A7J6IDC4               |  | 1.90E+08        | 1.44E+08        | 2.15E+08 | 8.28E+08        |  |  |
| A0A7J6EAF0                                           |  | 1.70E+08        | 1.18E+08        | 1.72E+08 | <b>7.66E+08</b> |  |  |
| A0A7J6GNI4                                           |  | 1.45E+08        | 0.77E+08        | 0.44E+08 | <b>1.69E+08</b> |  |  |
| A0A7J6FZF8<br>A0A7J6HQU3                             |  | <b>8.83E+07</b> | 7.65E+07        | 5.99E+07 | 4.87E+08        |  |  |
| A0A7J6GU50<br>A0A7J6GMZ3                             |  | 9.48E+07        | 5.66E+07        | 5.58E+07 | <b>2.04E+08</b> |  |  |
| A0A7J6GXB8<br>A0A7J6E2F6<br>A0A7J6I306               |  | 1.37E+08        | 0.33E+08        | 0.82E+08 | <b>2.75E+08</b> |  |  |
| A0A7J6GY94<br>A0A7J6EZI0                             |  | <b>6.71E+07</b> | 2.30E+07        | 5.70E+07 | 1.91E+07        |  |  |
| A0A7J6DSH8<br>A0A7J6ECG4                             |  | 3.21E+07        | <i>N.D.</i>     | 2.41E+07 | <b>3.10E+08</b> |  |  |



|                                        |                             |          |          |          |          |                                                                           |                            |
|----------------------------------------|-----------------------------|----------|----------|----------|----------|---------------------------------------------------------------------------|----------------------------|
| A0A7J6HEP2                             |                             | 4.54E+07 | N.D.     | 3.25E+07 | 4.29E+08 |                                                                           |                            |
| A0A7J6IBH6                             |                             | 5.50E+07 | N.D.     | 2.96E+07 | 3.39E+08 |                                                                           |                            |
| A0A7J6GR38                             | Beta-fructofuranosidase     | 0.76E+07 | 3.68E+08 | 2.75E+08 | 1.08E+08 | Sola l 12 (Tomato)                                                        | Food                       |
| A0A7J6DSF0                             | Cysteine protease inhibitor | 7.00E+08 | 3.03E+08 | 2.65E+08 | 1.52E+09 | Ani s 4 (Herring worm)                                                    | Food                       |
| A0A7J6G6H4<br>A0A7J6ENT1<br>A0A7J6F296 |                             | 2.24E+08 | 2.58E+08 | 1.32E+08 | 4.89E+08 | Sola t 3 (Potato)                                                         | Food                       |
| A0A7J6FLP0                             |                             | 1.03E+08 | 2.80E+08 | 1.18E+08 | 1.26E+08 | Amb a 1 (Short ragweed)<br>Art v 6 (Wormwood)<br>Cry j 1 (Japanese cedar) | Airway<br>Airway<br>Airway |
| A0A7J6HTG5                             | Pectate lyase               | N.D.     | 1.78E+07 | N.D.     | 1.11E+07 | Cup s 1 (Common cypress)<br>Hel a 6 (Sunflower)                           | Airway<br>Airway           |

|                          |          |          |          |          |          |                                                                                                    |                                              |
|--------------------------|----------|----------|----------|----------|----------|----------------------------------------------------------------------------------------------------|----------------------------------------------|
| A0A7J6F9E2               |          | 1.45E+07 | 1.59E+07 | N.D.     | 1.08E+08 | Jun a 1 (Mountain cedar)<br><br>Pen c 32 (Fungi-Ascomycete)                                        | Airway<br><br>Airway                         |
| A0A7J6I2E5               |          | N.D.     | N.D.     | N.D.     | 1.16E+08 |                                                                                                    |                                              |
| A0A7J6GVP7<br>A0A7J6G545 |          | N.D.     | N.D.     | N.D.     | 4.98E+06 |                                                                                                    |                                              |
| A0A7J6H491               | Profilin | 2.45E+08 | 2.05E+08 | 2.08E+08 | 5.80E+08 | Amb a 8 (Short ragweed)<br><br>Ara h 5 (Peanut)<br>Bet v 2 (White birch)<br><br>Cor a 2 (Hazelnut) | Airway<br><br>Food<br><br>Airway<br><br>Food |

|                                        |                            |                 |                 |             |                 |                                                                                                                                                                               |                                                           |
|----------------------------------------|----------------------------|-----------------|-----------------|-------------|-----------------|-------------------------------------------------------------------------------------------------------------------------------------------------------------------------------|-----------------------------------------------------------|
| <b>A0A7J6EUM0</b><br><b>A0A7J6HTU8</b> |                            | <i>N.D.</i>     | <i>N.D.</i>     | <i>N.D.</i> | <b>3.50E+07</b> | <i>Cyn d 12</i> (Bermuda grass)<br><i>Gly m 3</i> (Soybean)<br><i>Hev b 8</i> (Short ragweed)<br><i>Mal d 4</i> (Apple)<br><i>Pru p 4</i> (Peach)<br><i>Sola l 1</i> (Tomato) | Airway<br><br>Food<br>Contact<br><br>Food<br>Food<br>Food |
| <b>A0A7J6FVM7</b>                      | <b>Tubulin alpha chain</b> | <b>1.51E+09</b> | 1.03E+09        | 1.08E+09    | 2.64E+08        | <i>Der f 33</i> (House dust mite)<br><i>Der p 33</i> (House dust mite)                                                                                                        | Airway<br><br>Airway                                      |
| <b>A0A7J6EY26</b>                      |                            | <b>1.25E+09</b> | 0.20E+09        | 0.23E+09    | 2.65E+08        |                                                                                                                                                                               |                                                           |
| <b>A0A7J6H710</b>                      |                            | 4.32E+07        | 2.92E+07        | 5.20E+07    | <b>1.47E+09</b> |                                                                                                                                                                               |                                                           |
| <b>A0A7J6GA12</b><br><b>A0A7J6FJQ0</b> | <b>Alpha-amylase</b>       | <i>N.D.</i>     | <b>1.63E+08</b> | 0.15E+08    | <i>N.D.</i>     | <i>Bla g 11</i> (Cockroach)<br><i>Blo t 4</i> (Storage mite)<br><i>Der f 4</i> (House dust mite)                                                                              | Airway<br><br>Airway<br><br>Airway                        |

|                          |          |             |             |             |             |                                                                                                                                                                                           |        |
|--------------------------|----------|-------------|-------------|-------------|-------------|-------------------------------------------------------------------------------------------------------------------------------------------------------------------------------------------|--------|
|                          |          |             |             |             |             | <i>Der p 4</i> (House dust mite)                                                                                                                                                          | Airway |
|                          |          |             |             |             |             | <i>Hor v 16</i> (Barley)                                                                                                                                                                  | Food   |
|                          |          |             |             |             |             | <i>Per a 11</i> (Cockroach)                                                                                                                                                               | Airway |
| A0A7J6F8W0               | Expansin | 0.77E+08    | 1.54E+08    | 0.75E+08    | 1.39E+08    | <i>Cyn d 1</i> (Bermuda grass)<br><i>Lol p 1</i> (Rye grass)<br><i>Ory s 1</i> (Rice)<br><i>Phl p 1</i> (Timothy grass)<br><i>Poa p 1</i> (Kentucky blue grass)<br><i>Zea m 1</i> (Maize) | Airway |
| A0A7J6GYI3<br>A0A7J6GCT4 |          | 0.75E+08    | 1.57E+08    | 1.15E+08    | 3.09E+07    |                                                                                                                                                                                           |        |
| A0A7J6HHP6<br>A0A7J6I6H0 |          | 1.00E+08    | 0.95E+08    | 1.00E+08    | 5.06E+07    |                                                                                                                                                                                           |        |
| A0A7J6DLM1               |          | <i>N.D.</i> | 7.50E+07    | 8.72E+07    | <i>N.D.</i> |                                                                                                                                                                                           |        |
| A0A7J6GS30               |          | <i>N.D.</i> | 3.45E+07    | 1.02E+07    | <i>N.D.</i> |                                                                                                                                                                                           |        |
| A0A7J6HHF7               |          | <i>N.D.</i> | 2.89E+07    | <i>N.D.</i> | 2.92E+07    |                                                                                                                                                                                           |        |
| A0A7J6GND6<br>A0A7J6FBP3 |          | 1.06E+07    | 1.56E+07    | <i>N.D.</i> | 1.52E+08    |                                                                                                                                                                                           |        |
| A0A7J6FWX7               |          | 2.58E+07    | <i>N.D.</i> | 4.55E+07    | <i>N.D.</i> |                                                                                                                                                                                           |        |
| A0A7J6H0I3               |          | <i>N.D.</i> | <i>N.D.</i> | 4.85E+07    | 7.71E+06    |                                                                                                                                                                                           |        |

|                                        |                                                                                |             |                 |                 |                 |                                                                                                                                                                                                  |                                                                      |
|----------------------------------------|--------------------------------------------------------------------------------|-------------|-----------------|-----------------|-----------------|--------------------------------------------------------------------------------------------------------------------------------------------------------------------------------------------------|----------------------------------------------------------------------|
| <b>A0A7J6HGI1</b>                      | <b>Beta-amylase</b>                                                            | 0.03E+08    | <b>1.26E+08</b> | 1.07E+08        | <i>N.D.</i>     | <i>Hor v 17</i> (Barley)<br><i>Tri a 17</i> (Wheat)                                                                                                                                              | Food<br><br>Food                                                     |
| <b>A0A7J6F9B7</b><br><b>A0A7J6FJV6</b> |                                                                                | <i>N.D.</i> | <i>N.D.</i>     | <i>N.D.</i>     | <b>1.32E+07</b> |                                                                                                                                                                                                  |                                                                      |
| <b>A0A7J6GWH8</b>                      |                                                                                | <i>N.D.</i> | <i>N.D.</i>     | <i>N.D.</i>     | <b>1.32E+07</b> |                                                                                                                                                                                                  |                                                                      |
| <b>A0A7J6HG73</b>                      | <b>Bet v 1-domain containing protein (Pathogenesis-related protein, PR-10)</b> | 1.23E+10    | 1.08E+10        | <b>2.86E+10</b> | 2.46E+10        | <i>Ara h 8</i> (Peanut)<br><i>Bet v 1</i> (White birch)<br><i>Cor a 1</i> (Hazelnut)<br><i>Gly m 4</i> (Soybean)<br><i>Mal d 1</i> (Apple)<br><i>Pru p 1</i> (Peach)<br><i>Sola l 4</i> (Tomato) | Food<br><br>Airway<br><br>Airway<br><br>Food<br><br>Food<br><br>Food |
| <b>A0A7J6F1J6</b>                      |                                                                                | 1.70E+08    | 1.10E+08        | <b>1.82E+08</b> | 7.37E+07        |                                                                                                                                                                                                  |                                                                      |
| <b>A0A7J6EBP3</b>                      |                                                                                | <i>N.D.</i> | 2.89E+07        | 2.42E+07        | <b>4.20E+07</b> |                                                                                                                                                                                                  |                                                                      |
| <b>A0A7J6F1K3</b>                      |                                                                                | 8.94E+07    | <i>N.D.</i>     | <i>N.D.</i>     | <b>3.06E+08</b> |                                                                                                                                                                                                  |                                                                      |
| <b>A0A7J6HLD9</b>                      |                                                                                | <i>N.D.</i> | <i>N.D.</i>     | <i>N.D.</i>     | <b>2.18E+10</b> |                                                                                                                                                                                                  |                                                                      |

|                          |                  |          |          |          |          |                                                                              |                                          |
|--------------------------|------------------|----------|----------|----------|----------|------------------------------------------------------------------------------|------------------------------------------|
| A0A7J6HEQ6               |                  | N.D.     | N.D.     | N.D.     | 2.73E+08 |                                                                              |                                          |
| A0A7J6HG14               |                  | N.D.     | N.D.     | N.D.     | 4.69E+07 |                                                                              |                                          |
| A0A7J6HDD3<br>A0A7J6HFA3 |                  | N.D.     | N.D.     | N.D.     | 3.79E+07 |                                                                              |                                          |
| A0A7J6I6E2               |                  | N.D.     | N.D.     | N.D.     | 8.10E+06 |                                                                              |                                          |
| A0A7J6FGV0               | Phospholipase A1 | 4.03E+08 | 0.82E+08 | N.D.     | 3.07E+08 | Pol e 1 (Wasp)<br><br>Vesp v 1 (Asian hornet)<br><br>Ves m 1 (Yellow jacket) | Systemic<br><br>Systemic<br><br>Systemic |
| A0A7J6IAY5               |                  | 4.03E+08 | 0.82E+08 | N.D.     | 1.40E+07 |                                                                              |                                          |
| A0A7J6H0B6               |                  | 4.03E+08 | 0.82E+08 | N.D.     | 1.19E+07 |                                                                              |                                          |
| A0A7J6HXF0               |                  | 0.62E+07 | 1.08E+07 | 1.24E+07 | 4.49E+06 |                                                                              |                                          |

|                                                                                                |                                                |          |          |          |          |                            |         |
|------------------------------------------------------------------------------------------------|------------------------------------------------|----------|----------|----------|----------|----------------------------|---------|
| A0A7J6G3Y7<br>A0A7J6F236<br>A0A7J6EPM4                                                         |                                                | 4.53E+07 | N.D.     | N.D.     | N.D.     |                            |         |
| A0A7J6H2M1                                                                                     | Lactate dehydrogenase                          | 0.53E+07 | 3.46E+07 | 5.11E+07 | 1.35E+08 | Pan h 10 (Striped catfish) | Food    |
| A0A7J6GLR3<br>A0A7J6FBQ5<br>A0A7J6GLQ5<br>A0A7J6H4N6<br>A0A7J6GLT4<br>A0A7J6E325<br>A0A7J6FEC2 | (R)-mandelonitrile lyase                       | 3.49E+08 | 0.31E+08 | 6.63E+08 | 4.40E+07 | Pru du 10 (Almond)         | Food    |
| A0A7J6GC68<br>A0A7J6FYG8                                                                       |                                                | 1.05E+08 | 0.23E+08 | 1.00E+08 | 4.52E+08 |                            |         |
| A0A7J6EMQ7                                                                                     |                                                | 2.12E+07 | 1.78E+07 | N.D.     | N.D.     |                            |         |
| A0A7J6HN73<br>A0A7J6H0Z2                                                                       |                                                | 4.44E+07 | N.D.     | 2.47E+07 | 2.25E+07 |                            |         |
| A0A7J6GLW1                                                                                     | GMC_Oxidoreductase_N domain-containing protein | 2.12E+07 | 1.78E+07 | N.D.     | N.D.     | Mala s 12 (Skin yeast)     | Contact |

|                                                      |                                      |          |          |          |          |                                                |                     |
|------------------------------------------------------|--------------------------------------|----------|----------|----------|----------|------------------------------------------------|---------------------|
| A0A7J6FK77                                           | ML domain-containing protein         | N.D.     | 1.29E+07 | 1.68E+07 | N.D.     | Blo t 2 (Storage mite)                         | Airway              |
| A0A7J6E1L6<br>A0A7J6E5W1                             | Endo-1,3(4)-beta-glucanase           | N.D.     | N.D.     | 1.13E+07 | N.D.     | Hev b 2 (Latex rubber)<br><br>Mus a 5 (Banana) | Contact<br><br>Food |
| A0A7J6F7K7<br>A0A7J6GPK7<br>A0A7J6H2Q1<br>A0A7J6GR85 |                                      | N.D.     | N.D.     | N.D.     | 6.04E+07 |                                                |                     |
| A0A7J6I550                                           |                                      | N.D.     | N.D.     | N.D.     | 1.86E+07 |                                                |                     |
| A0A7J6I9Z8                                           |                                      | N.D.     | N.D.     | N.D.     | 1.54E+07 |                                                |                     |
| A0A7J6H1U8                                           | Agglutinin domain-containing protein | 1.82E+09 | 4.07E+08 | 6.96E+08 | 2.54E+09 | Tri a 18 (Wheat)                               | Food                |
| A0A7J6G4B7<br>A0A7J6F1V1                             |                                      | 7.09E+07 | N.D.     | 0.72E+07 | 3.35E+07 |                                                |                     |
| A0A7J6FGU9                                           |                                      | N.D.     | N.D.     | 1.39E+08 | 2.54E+09 |                                                |                     |



|                                                                                  |                                                 |          |      |      |          |                        |          |
|----------------------------------------------------------------------------------|-------------------------------------------------|----------|------|------|----------|------------------------|----------|
| A0A7J6FBU3                                                                       | X8 domain-containing protein                    | 5.21E+06 | N.D. | N.D. | 1.00E+08 | Ole e 10 (Olive)       | Airway   |
| A0A7J6HRL7                                                                       | Non-specific serine/threonine<br>protein kinase | 1.06E+07 | N.D. | N.D. | 5.95E+07 | For t 1 (Biting midge) | Systemic |
| A0A7J6GSM4                                                                       |                                                 | N.D.     | N.D. | N.D. | 5.29E+07 |                        |          |
| A0A7J6DSK9                                                                       |                                                 | N.D.     | N.D. | N.D. | 4.93E+07 |                        |          |
| A0A7J6ELT8<br>A0A7J6GN21<br>A0A7J6FJW2                                           |                                                 | N.D.     | N.D. | N.D. | 1.05E+07 |                        |          |
| A0A7J6FL68<br>A0A7J6F113<br>A0A7J6FAW1<br>A0A7J6E405<br>A0A7J6FUU9<br>A0A7J6HGC3 |                                                 | N.D.     | N.D. | N.D. | 4.66E+06 |                        |          |
| A0A7J6H6B1                                                                       |                                                 | N.D.     | N.D. | N.D. | 1.10E+08 |                        |          |

|                                                      |                                   |          |          |          |                    |                              |          |
|------------------------------------------------------|-----------------------------------|----------|----------|----------|--------------------|------------------------------|----------|
| A0A7J6FRH4<br>A0A7J6EPV2                             | EF-hand domain-containing protein | 0.80E+08 | 0.53E+08 | 1.25E+08 | 2.16E+08           | Cra c 4 (North Sea shrimp)   | Food     |
| A0A7J6I7N3                                           |                                   | 3.22E+06 | N.D.     | N.D.     | 1.52E+07           | Cra a 4 (Pacific oyster)     | Food     |
| A0A7J6EYA1<br>A0A7J6GQN3<br>A0A7J6GED9<br>A0A7J6EJR9 |                                   | N.D.     | N.D.     | N.D.     | 2.39E+07           | Pen m 4 (Black Tiger shrimp) | Food     |
|                                                      |                                   |          |          |          |                    | Pon l 4 (Crayfish)           | Food     |
|                                                      |                                   |          |          |          | Scy p 4 (Mud crab) | Food                         |          |
| A0A7J6GJR5                                           | Carboxypeptidase                  | 0.39E+09 | 1.43E+09 | 0.93E+09 | 6.89E+08           | Api m 9 (Honeybee)           | Systemic |
| A0A7J6I4U3                                           |                                   | 2.23E+08 | 1.07E+09 | 7.85E+08 | 2.94E+08           |                              |          |
| A0A7J6FRW9                                           |                                   | 1.03E+08 | 3.38E+08 | 2.73E+08 | 4.06E+07           |                              |          |
| A0A7J6HYY7                                           |                                   | 3.27E+08 | 3.09E+08 | 3.57E+08 | 7.59E+08           |                              |          |
| A0A7J6HQS1<br>A0A7J6GS12                             |                                   | 1.30E+08 | 1.43E+08 | 0.63E+08 | 1.92E+08           |                              |          |

|                          |  |          |          |          |          |  |  |
|--------------------------|--|----------|----------|----------|----------|--|--|
| A0A7J6E757<br>A0A7J6GXF1 |  | 0.55E+08 | 1.26E+08 | 1.29E+08 | 5.39E+07 |  |  |
| A0A7J6EJT5<br>A0A7J6EVP8 |  | 1.39E+07 | 7.26E+07 | N.D.     | 1.28E+08 |  |  |
| A0A7J6H6U1               |  | N.D.     | 4.90E+07 | 2.24E+07 | N.D.     |  |  |
| A0A7J6H7L2               |  | N.D.     | 4.72E+07 | N.D.     | N.D.     |  |  |
| A0A7J6E0D4               |  | 0.61E+07 | 3.07E+07 | 1.42E+07 | 8.30E+06 |  |  |
| A0A7J6H4X1               |  | N.D.     | 1.35E+07 | 0.81E+07 | N.D.     |  |  |
| A0A7J6GH52<br>A0A7J6EU30 |  | N.D.     | 1.14E+07 | N.D.     | N.D.     |  |  |
